# Supplementary material for: Electromechanical behaviour of Nafion-based soft actuators
Source: Royal Society of Chemistry journal article supplement (doi:10.1039/c3tb20243g), 2013-01-01
Supplement: c3tb20243g.pdf [file c3tb20243g.pdf]

## Electromechanical Behaviour of Nafion-based Soft Actuators

Leila Naji, John A. Chudek, Eric W. Abel and Richard T. Baker\*

### Supplementary Information

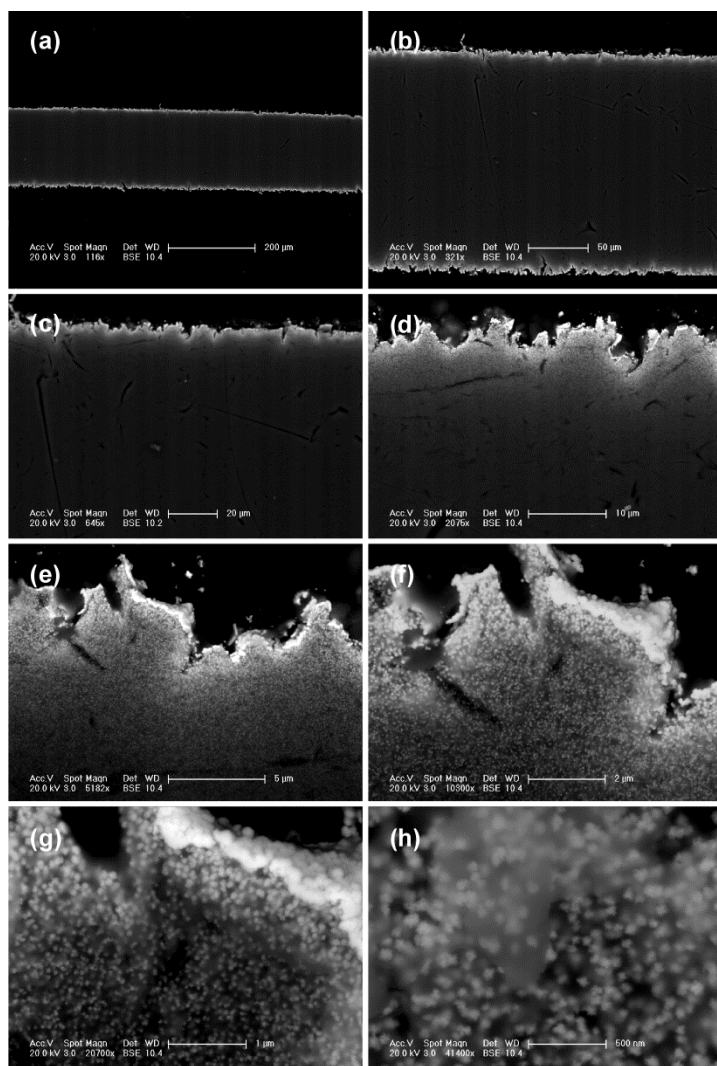

Figure S1. Back-Scattered Electron images of a cross-section of the IPMC sample Pt<sub>1</sub>Com taken at increasing magnifications showing the porous electrode structure and the individual Pt clusters.
